# Supplementary material for: CsPbBr3 perovskite nanocrystals as highly selective and sensitive spectrochemical probes for gaseous HCl detection
Source: Royal Society of Chemistry journal article supplement (doi:10.1039/c6tc04136a), 2016-11-30
Supplement: c6tc04136a1.pdf [file c6tc04136a1.pdf]

## **ELECTRONIC SUPPLEMENTARY INFORMATION**

### **CsPbBr<sub>3</sub> Perovskite Nanocrystals as Highly Selective and Sensitive Spectrochemical Probes for HCl Detection**

Xiao Chen, ‡<sup>a</sup> Huawei Hu, ‡<sup>ab</sup> Zhaoming Xia,<sup>a</sup> Wei Gao,<sup>a</sup> Wangyan Gou,<sup>a</sup> Yongquan Qu<sup>a</sup> and Yuanyuan Ma<sup>\*a</sup>

<sup>a</sup>Center for Applied Chemical Research, Frontier Institute of Science and Technology and State Key Laboratory for Mechanical Behavior of Materials, Xi'an Jiaotong University, Xi'an 710049, China

<sup>b</sup>Department of Chemistry and Energy Institute, The Hong Kong University of Science and Technology, Clear Water Bay, Hong Kong

‡ These authors contributed equally.

\*Corresponding authors, E-mail: [yyma@mail.xjtu.edu.cn](mailto:yyma@mail.xjtu.edu.cn)

## Supporting Figures

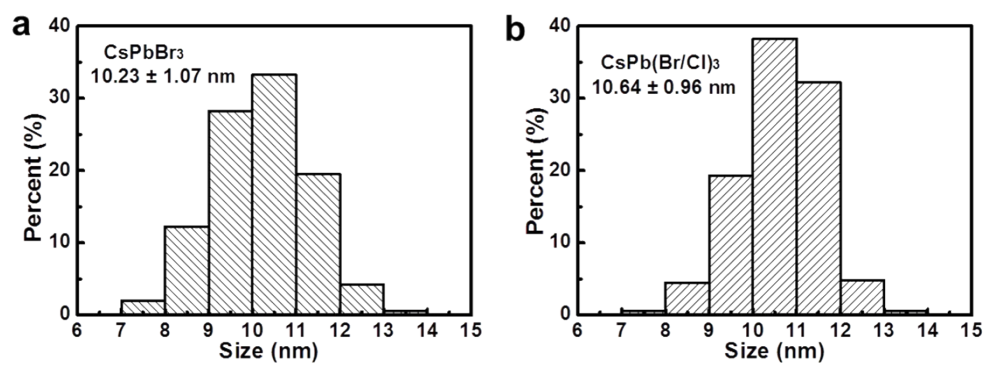

**Figure S1.** Size distributions of the CsPbBr<sub>3</sub> nanocrystals (a) as-synthesized nanocrystals and (b) HCl-treated nanocrystals.

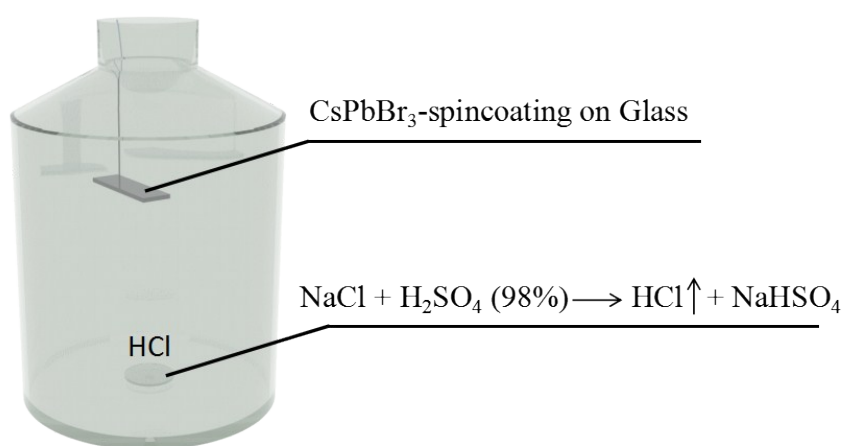

**Figure S2.** Schematic diagram of experimental set-up

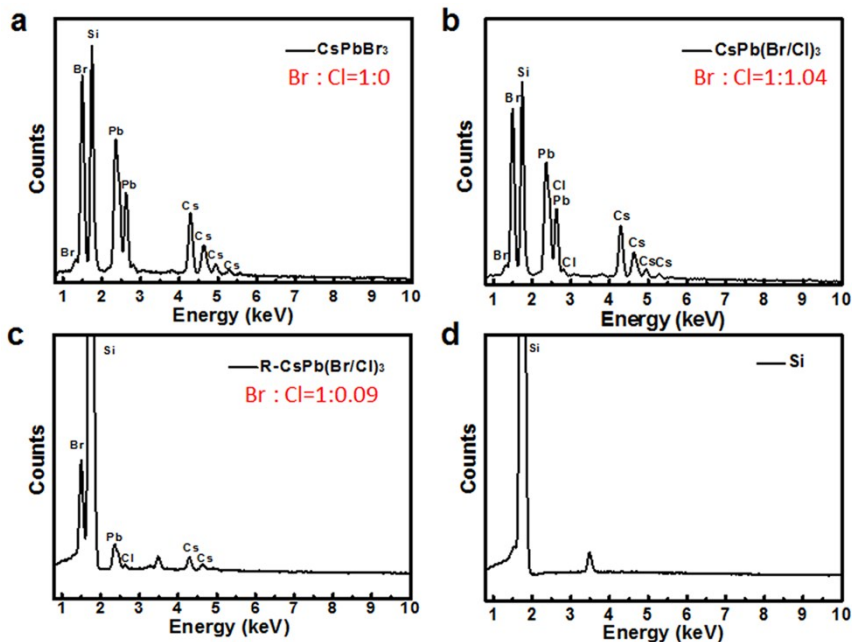

**Figure S3.** The energy dispersive spectrometry (EDS) results of  $\text{CsPbBr}_3$  nanocrystals as the spectrochemical probes for detection of HCl vapor. (a)  $\text{CsPbBr}_3$ ; (b)  $\text{CsPb}(\text{Br}/\text{Cl})_3$  with Br/Cl ratio of 1:1.04; (c)  $\text{R-CsPb}(\text{Br}/\text{Cl})_3$  with Br/Cl ratio of 1:0.09; (d) the silicon substrate.

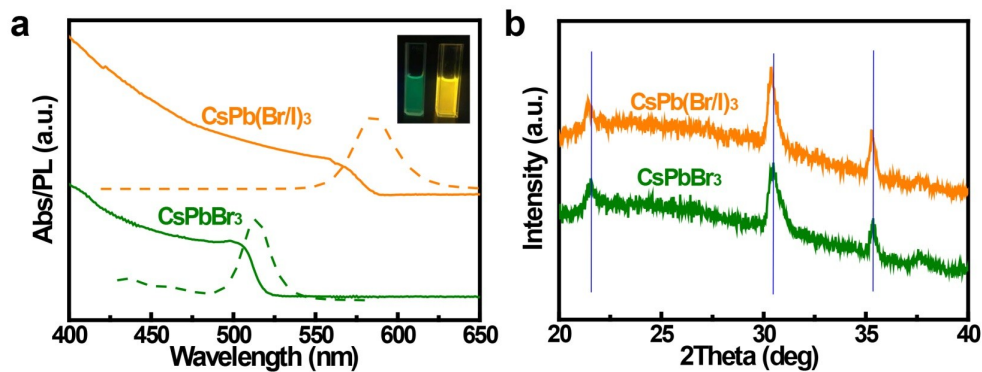

**Figure S4.** The  $\text{CsPbBr}_3$  nanocrystals as the spectrochemical probes for detection of HI vapor: (a) PL spectra and UV-vis absorption of  $\text{CsPbBr}_3$  nanocrystals exposed to HI for 60 minutes. (b) XRD patterns of the as-synthesized  $\text{CsPbBr}_3$  and  $\text{CsPb}(\text{Br}/\text{I})_3$ .

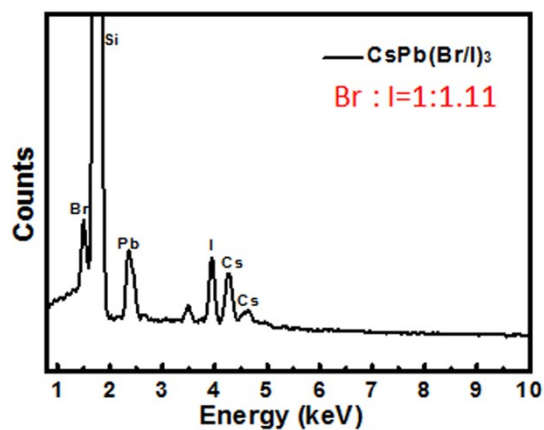

**Figure S5.** The EDS result of CsPb(Br/I)<sub>3</sub> supported on Si slide.

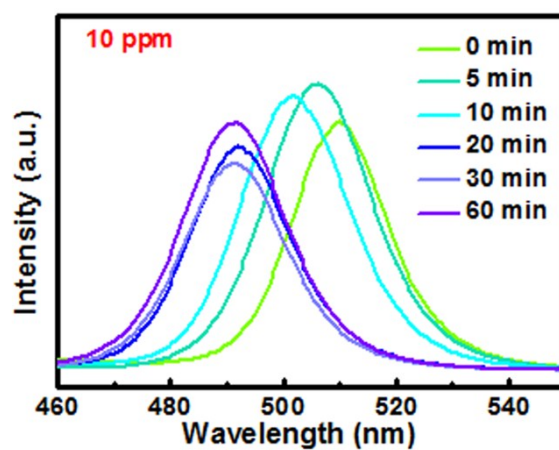

**Figure S6.** The non-normalized PL spectra of CsPbBr<sub>3</sub> nanocrystals exposed to 10 ppm HCl as a function of time.

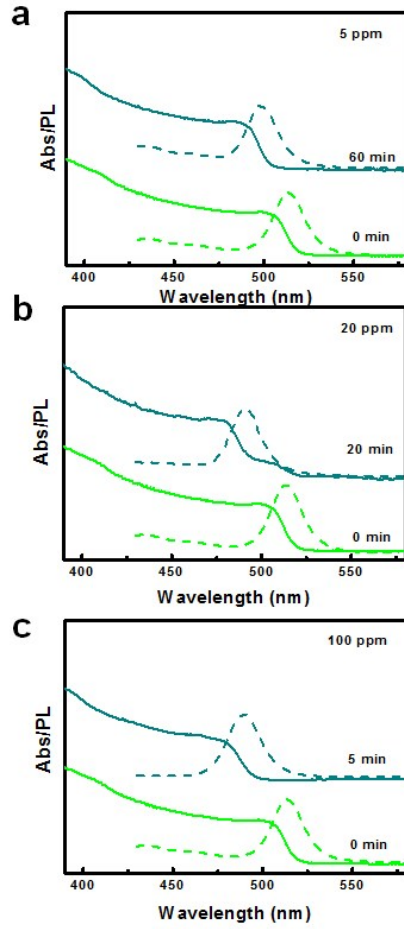

**Figure S7.** PL and UV-vis absorption spectra of CsPbBr<sub>3</sub> nanocrystal exposed to HCl vapor with concentrations of (a) 5 ppm, (b) 20 ppm and (c) 100 ppm.

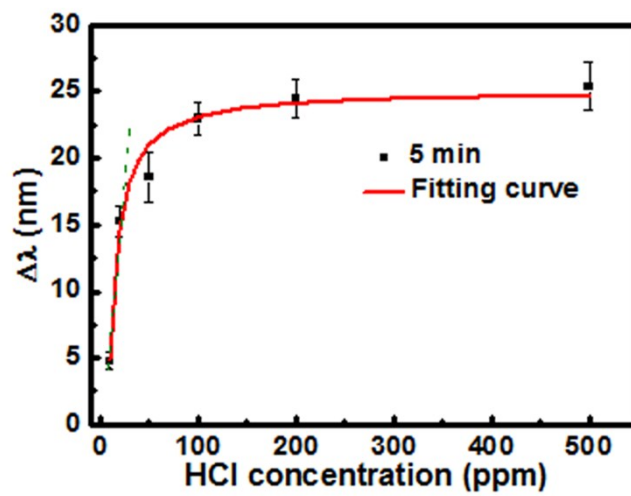

**Figure S8.** The response of the shift of PL peak position nanocrystals exposed to HCl vapor for CsPbBr<sub>3</sub> with various concentrations for 5 min reaction.

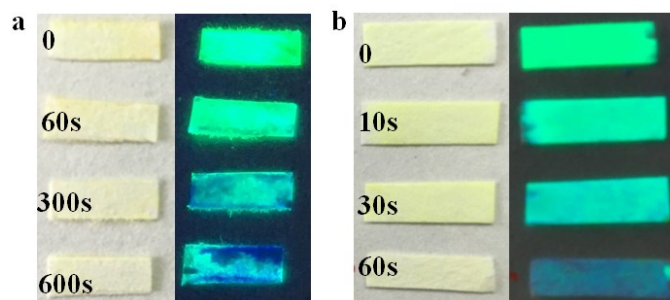

**Figure S9.** Photography images of the filter paper based CsPbBr<sub>3</sub> nanocrystal chemical sensors exposed to HCl vapor (5 and 10 ppm) for various times.
